# Supplementary material
Source: Springer Nature journal article supplement (https://www.springermedizin.de/resource/supplementary/12890_2008_139_MOESM6_ESM.pdf/9506068)

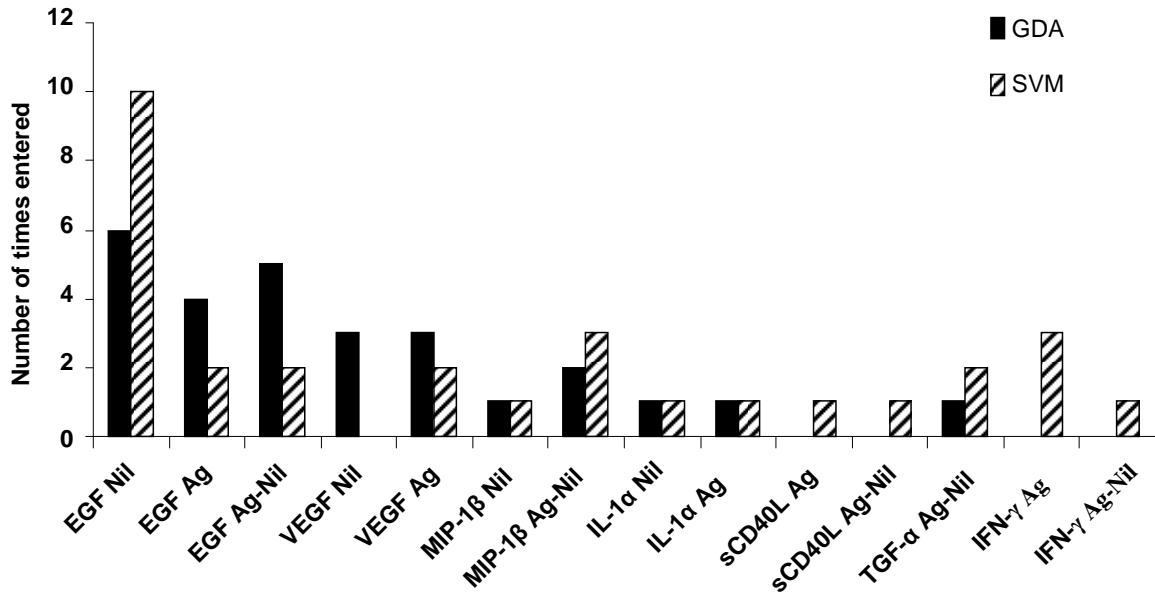

Supplement: MOESM6 [file 9506068]
